# Supplementary material
Source: publisher figshare collection journal article supplement (https://karger.figshare.com/ndownloader/files/28409781)
Supplement: Supplementary file 1 [file 28409781]

**S. Table 1.** Quality Criteria Checklist for Included Studies.

| **Study** | **Inclusion-Exclusion Criteria Specified** | **Sample Selection Described** | **Study Type** | **Demographics**  **Specified** | **AKI Rates Specified** | **KRT Rates Specified** |
| --- | --- | --- | --- | --- | --- | --- |
| **Aggarwal et al. 2020 [10]** | Y | Y | P | Y | Y | N |
| **Chen T et al. 2020 [11]** | Y | Y | R | Y | Y | N |
| **Cheng et al. 2020 [9]** | Y | Y | P | Y | Y | N |
| **Li et al. 2020 [12]** | Y | Y | R | Y | Y | N |
| **Ling et al.**  **2020 [13]** | Y | Y | R | Y | N | Y |
| **Pei et al.2020 [6]** | Y | Y | R | Y | Y | Y |
| **Richardson et al. 2020 [14]** | Y | Y | CS | Y | Y | N |
| **Wang L et al. 2020 [15]** | Y | Y | P | Y | Y | N |
| **Yang F et al. 2020 [16]** | Y | Y | R | Y | Y | N |
| **Wang D et al. 2020 [17]** | Y | Y | CS | Y | Y | N |
| **Yang X et al.2020 [18]** | Y | Y | R | Y | Y | Y |
| **Su et al. 2020 [7]** | Y | Y | R | Y | Y | Y |
| **Chen N et al. 2020 [19]** | Y | Y | R | Y | Y | Y |
| **Zhou et al. 2020 [25]** | Y | Y | R | Y | Y | Y |
| **Wang D et al. 2020 [21]** | Y | Y | CS | Y | Y | Y |
| **Zhang et al.2020 [22]** | Y | Y | CS | Y | Y | Y |
| **Diao et al. 2020 [8]** | Y | Y | R | Y | Y | N |
| **Xiao et al. 2020 [23]** | Y | Y | R | Y | Y | N |
| **Guan et al. 2020 [24]** | Y | Y | R | Y | Y | Y |
| **Arentz et al. 2020 [25]** | Y | Y | CS | Y | Y | N |
| **Zhao et al. 2020 [26]** | Y | Y | R | Y | Y | Y |
| **Huang et al. 2020 [5]** | Y | Y | R | Y | Y | Y |
| **Zhen et al. 2020 [27]** | Y | Y | R | Y | Y | Y |
| **ICNARC [28]** | Y | Y | P | Y | Y | Y |
| **Cummings et al. 2020 [29]** | Y | Y | P | Y | Y | Y |
| **Zheng Y I et al. 2020 [30]** | Y | Y | R | Y | Y | Y |
| **Yuan et al. 2020 [31]** | N | Y | R | Y | Y | Y |
| **Argenziano et al. 2020 [32]** | Y | Y | CS | Y | Y | Y |
| **Liu et al. 2020 [33]** | Y | Y | R | Y | N | N |
| **Cao et al. 2020 [34]** | Y | Y | P | Y | Y | N |
| **Xu S et al. 2020 [35]** | Y | Y | R | Y | Y | N |
| **Cai et al. 2020**  **[36]** | N | Y | R | Y | Y | N |
| **Xu Y et al. 2020 [37]** | N | Y | R | Y | Y | Y |
| **Shi et al. 2020 [38]** | Y | Y | R | Y | Y | Y |
| **Luo et al. 2020 [39]** | Y | Y | R | Y | Y | N |
| **Ruan et al. 2020 [40]** | Y | Y | R | Y | Y | Y |
| **Hu et al. 2020 [41]** | Y | Y | R | Y | Y | Y |
| **Du et al. 2020 [42]** | Y | Y | R | Y | Y | Y |
| **Wu C et al. 2020 [43]** | Y | Y | R | Y | Y | N |
| **Kyung et al. 2020 [44]** | N | Y | R | Y | Y | Y |
| **Deng et al. 2020 [45]** | Y | Y | R | Y | Y | N |
| **Hirsch et al. 2020 [46]** | Y | Y | R | Y | Y | Y |
| **Mohamed et al. 2020 [47]** | Y | Y | R | Y | Y | Y |
| **Chan et al. 2020 [48]** | Y | Y | R | Y | Y | Y |
| **Fisher et al. 2020 [49]** | Y | Y | R | Y | Y | Y |
| **Lim J et al. 2020 [50]** | Y | Y | R | Y | N | Y |
| **Wu H et al. 2020 [51]** | Y | Y | CS | Y | N | Y |
| **Pelayo et al. 2020 [52]** | Y | Y | R | Y | Y | Y |
| **Nalesso et al. 2020 [53]** | Y | Y | P | Y | Y | N |
| **Zhang et al. 2020 [54]** | Y | Y | R | Y | Y | Y |
| **Xu et al. 2020 [55]** | Y | Y | R | Y | Y | Y |
| **Ryang Na et al. 2020 [56]** | Y | Y | P | Y | Y | N |
| **Dudoignan et al. 2020 [57]** | Y | Y | P | Y | Y | Y |
| **Ruben et al. 2020 [58]** | Y | Y | P | Y | Y | Y |
| **Chen et al. 2020 [59]** | Y | Y | CS | Y | Y | Y |
| **Derespina et al. 2020 [60]** | Y | Y | R | Y | Y | Y |
| **Gupta et al. 2020 [61]** | Y | Y | P | Y | Y | Y |
| **Zhang B. et al 2020 [62]** | Y | Y | P | Y | Y | N |
| **Daqing H. et al 2020 [63]** | Y | Y | R | Y | Y | N |
| **Zhou H. et al 2020 [64]** | Y | Y | R | Y | N | N |

KRT, kidney replacement therapy; N, no; Y, yes; CS, case series; P, prospective; R, retrospective.
